# Supplementary material for: A roadmap to the molecular human linking multiomics with population traits and diabetes subtypes
Source: PubMed Central journal article supplement — Nat Commun. 2024 Aug 19;15:7111. doi: 10.1038/s41467-024-51134-x (PMC11333501; doi:10.1038/s41467-024-51134-x), 2024-08-19
Supplement: 41467_2024_51134_MOESM3_ESM.pdf [file 41467_2024_51134_MOESM3_ESM.pdf]

## Description of Additional Supplementary Files

**Supplementary Data 1.** List of non-genomic molecular traits measured along with list of RNA deployed to conduct MBH

**Supplementary Data 2.** GGM. Association statistics and residuals were computed using the linear model “ $\text{lm}(\text{ OMICS} \sim \text{AGE} + \text{SEX} + \text{BMI} + \text{DIAB} + \text{genoPC1} + \text{genoPC2} + \text{genoPC3} + \text{somaPC1} + \text{somaPC2} + \text{somaPC3})$ ”. Platform-wise Bonferroni significant correlations ( $p\text{-value} < 0.05 / (\text{NPLAT} * (\text{NPLAT}-1)/2)$ ), where NPLAT represents the number of traits measured on the respective platform, were retained

**Supplementary Data 3.** Correlation levels of statistically significant MBH. Spearman correlation coefficients between unscaled raw omics data were computed. Platform-pairwise Bonferroni significance cutoffs ( $p < 0.05 / (n\text{PLTA1} * n\text{PLAT2} / 2)$ ) were obtained after cross-platform correlation.

**Supplementary Data 4.** Associations between gene SNPs and methylation levels (meQTL's). Expression data was log-scaled, with all values off-set by the smallest occurring value in the dataset in order to avoid taking the log of zero, and z-scored. Methylation d(CpG) were b-values. The following linear model was used to compute the associations: meQTL:  $\text{lm}(\text{ CpG} \sim \text{SNP} + \text{AGE} + \text{SEX} + \text{BMI} + \text{DIAB} + \text{genoPC1} + \text{genoPC2} + \text{genoPC3})$ . A significance cut-off of  $p\text{-value} < 5 \times 10^{-8}$  was used.

**Supplementary Data 5.** Associations between methylation levels and mRNA (eQTM's). Expression data was log-scaled, with all values off-set by the smallest occurring value in the dataset in order to avoid taking the log of zero, and z-scored. Methylation d(CpG) were b-values. The following linear model was used to compute the associations: eQTM:  $\text{lm}(\text{ transcriptomics} \sim \text{CpG} + \text{SNP} + \text{AGE} + \text{SEX} + \text{BMI} + \text{DIAB} + \text{genoPC1} + \text{genoPC2} + \text{genoPC3})$ . A significance cut-off of  $p\text{-value} < 5 \times 10^{-8}$  was used.

**Supplementary Data 6.** Associations between gene SNPs and mRNA (eQTL's). Expression data was log-scaled, with all values off-set by the smallest occurring value in the dataset in order to avoid taking the log of zero, and z-scored. The following linear model was used to compute the associations: eQTL:  $\text{lm}(\text{ transcriptomics} \sim \text{SNP} + \text{AGE} + \text{SEX} + \text{BMI} + \text{DIAB} + \text{genoPC1} + \text{genoPC2} + \text{genoPC3})$

**Supplementary Data 7.** Multiomics GWAS. Omicsdata was inverse-normal scaled and residual were computed using the linear model “ $\text{lm}(\text{ Omicsdata} \sim \text{SEX} + \text{AGE} + \text{BMI} + \text{DIAB} + \text{genoPC1} + \text{genoPC2} + \text{genoPC3} + \text{somaPC1} + \text{somaPC2} + \text{somaPC3})$ ”. After QC, excluding non-autosomal SNPs,  $\text{MAF} < 5\%$ ,  $\text{HWE } p\text{value} < 10^{-6}$ , or genotyping rate  $< 98\%$ , 1,221,345 SNPs for 353 samples were available

**Supplementary Data 8.** Multiomics EWAS. Residuals of methylation beta values (CpG) were computed using the linear model “ $\text{lm}(\text{ CpG} \sim \text{AGE} + \text{SEX} + \text{BMI} + \text{DIAB} + \text{Gran} + \text{NK} + \text{CD4T} + \text{CD8T} + \text{Mono} + \text{Bcell} + \text{genoPC1} + \text{genoPC2} + \text{genoPC3})$ ” and then z-scored. Saliva and urine metabolites were first normalized by saliva and urine osmolality, respectively. All omics variables were then inverse normal-scaled and

residuals computed using the linear model “lm ( Omicsdata ~ AGE + SEX + BMI + DIAB + genoPC1 + genoPC2 + genoPC3 )” and then z-scored. Association statistics were then computed using the linear model “lm( CpG\_residual ~ Omicsdata\_residual )”. Associations reaching an ad hoc significance level of  $5 \times 10^{-8}$  were retained. CpG sites were annotated for gene names and CpG position relative to the genes using the Illumina provided HumanMethylation 450k annotation file.

**Supplementary Data 9.** Multiomics TWAS. RNA expression data with less than 100 valid data points or median expression levels below 1 TPM were removed. Expression data was log-scaled, with all values offset by the smallest occurring value in the dataset in order to avoid taking the log of zero, and z-scored. Saliva and urine metabolites were normalized by saliva osmolality and urine creatinine obtained from the respective platform, respectively. The comicsdata was then inverse-normal scaled. Metabolites and then samples with more than 50% missing values were removed. Association statistics were then computed using the linear model “lm( OMICS ~ transcriptomics + AGE + SEX + BMI + DIAB + genoPC1 + genoPC2 + genoPC3 + CD8 + CD4 + NK + Bcell + Mono + Gran + Eos )”. Associations reaching an ad hoc significance level of  $5 \times 10^{-8}$  were retained.

**Supplementary Data 10.** Correlation levels of molecules measured on both SOMA and OLINK. Spearman correlation coefficients between unscaled raw omics data were computed. Platform-pairwise Bonferroni significance cutoffs ( $p < 0.05 / ( nPLTA1 * nPLAT2 / 2 )$ ) were obtained after cross-platform correlation.

**Supplementary Data 11.** Molecules associated with AGE. Association statistics were computed using the linear model “lm( OMICS ~ AGE + SEX + BMI + DIAB + genoPC1 + genoPC2 + genoPC3 )”. Associations reaching an ad hoc significance level of  $5 \times 10^{-8}$  were retained.

**Supplementary Data 12.** Molecules associated with SEX. Association statistics were computed using the linear model “lm( OMICS ~ SEX + AGE + BMI + DIAB + genoPC1 + genoPC2 + genoPC3 )”. Associations reaching an ad hoc significance level of  $5 \times 10^{-8}$  were retained.

**Supplementary Data 13.** Molecules associated with BMI. Association statistics were computed using the linear model “lm( OMICS ~ BMI + SEX + AGE + DIAB + genoPC1 + genoPC2 + )”. Associations reaching an ad hoc significance level of  $5 \times 10^{-8}$  were retained.

**Supplementary Data 14.** Molecules associated with T2D. Association statistics were computed using the linear model “lm( OMICS ~ DIAB + BMI + SEX + AGE + genoPC1 + genoPC2 + genoPC3 )”. Associations reaching an ad hoc significance level of  $5 \times 10^{-8}$  were retained.

**Supplementary Data 15.** The gene transcripts associated with CXCL11 and CXCL10 overlap with molecules involved in responses to viral infection

**Supplementary Data 16.** List of metabolic and proteinlist of metabolic and protein signatures defining T2D subgroups, detected in our previous study, and overlapping with our multiomics dataset

**Supplementary Data 17.** List of molecules forming multiomics MARD cluster

**Supplementary Data 18.** List of molecules forming multiomics MOD cluster

**Supplementary Data 19.** List of molecules forming multiomics SIRD cluster

**Supplementary Data 20.** List of molecules forming multiomics SIDD cluster
